# Supplementary material
Source: Springer Nature journal article supplement (https://www.springermedizin.de/resource/supplementary/13058_2010_9529_MOESM7_ESM.pdf/9702366)

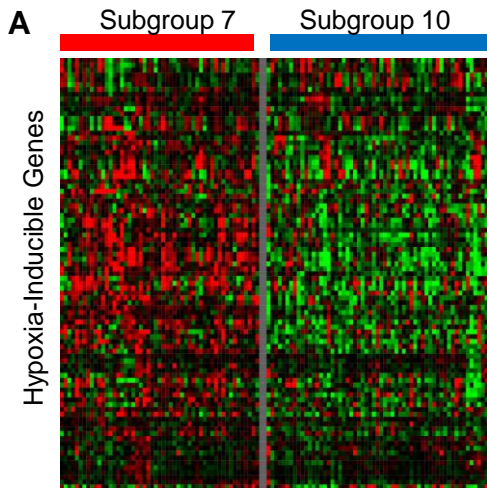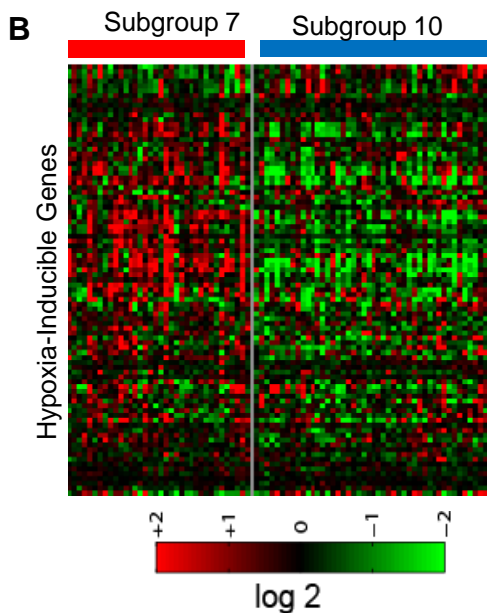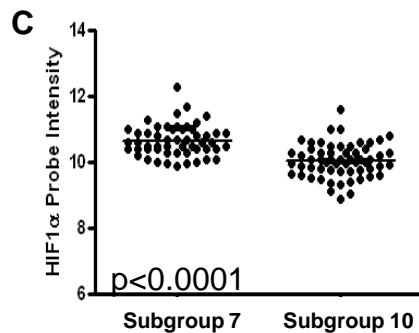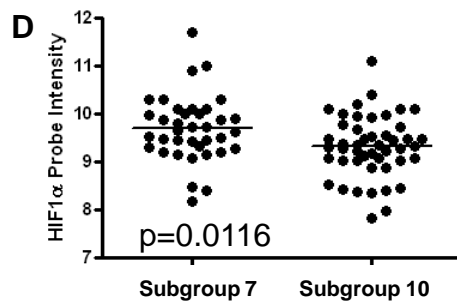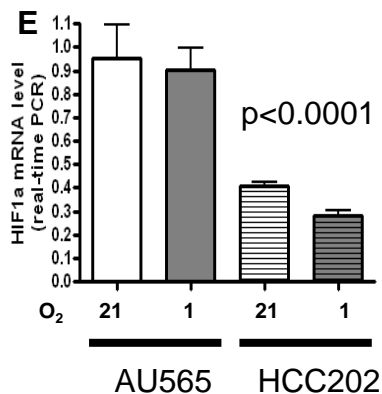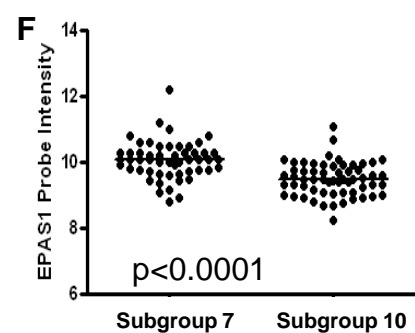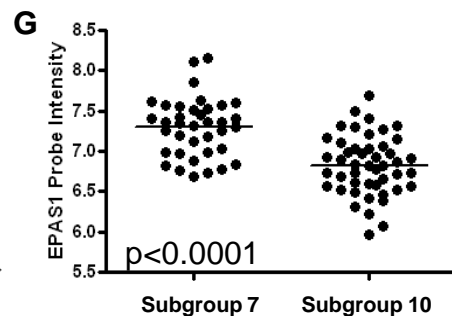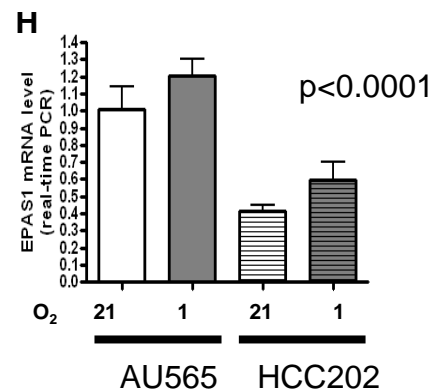

Supplement: MOESM7 [file 9702366]
